# Supplementary material for: Resilience and Vulnerability to Stress-Induced Anhedonia: Unveiling Brain Gene Expression and Mitochondrial Dynamics in a Mouse Chronic Stress Depression Model
Source: MDPI journal article supplement (doi:10.3390/biom13121782), 2023-12-12
Supplement: s1 [file s1]

## Supplementary File

### Results

Fisher's exact test did not reveal significant differences in the number of anhedonic animals in untreated and DS-treated groups ( $p=0.29$ , Fisher's exact test, Fig. S1).

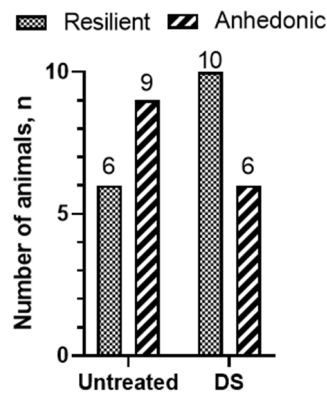

Figure S1. Number of resilient and anhedonic animals in untreated and DS-treated groups.

### Behavioural comparison between stressed untreated and DS-treated resilient and anhedonic groups

#### *Tail suspension test*

In the duration of immobility in the tail suspension test, two-way ANOVA revealed a significant main effect of anhedonia factor ( $F_{1,27}=23.17$ ,  $p<0.01$ , two-way ANOVA, Fig. S2A), but not of treatment factor or the interaction ( $F_{1,27}=0.02$ ,  $p=0.88$ , and  $F_{1,27}=1.43$ ,  $p=0.24$ ., respectively, two-way ANOVA). Post-hoc test revealed a significant increase of the immobility duration in both anhedonic groups compared to treatment-matched resilient groups (untreated:  $p=0.04$ ; DS-treated:  $p<0.01$ , Šídák's test).

In the latency to the first immobility episode, both main factors of anhedonia and treatment were significant ( $F_{1,27}=20.70$ ,  $p<0.01$ , and  $F_{1,27}=9.96$ ,  $p<0.01$ , respectively two-way ANOVA Fig. S2B). No significant interaction of the factors was found ( $F_{1,27}=0.0002$ ,  $p=0.99$ , two-way ANOVA). Group difference was observed between treatment-matched groups: in both untreated and DS-treated groups, latency to immobility was significantly decreased in the anhedonic mice (both  $p=0.02$ , Tukey's test). In the DS-treated resilient group, this parameter was significantly higher than in untreated anhedonic group ( $p=0.02$ , Tukey's test) We found no group differences between untreated and DS-treated subgroups with

respect to the development of anhedonia in the latency to the first immobility episode (resilient:  $p=0.14$ , anhedonic  $p=0.14$ , Tukey's test).

### *Splash test*

In the splash test, latency to groom was significantly affected by both anhedonia and treatment main factors ( $F_{1,27}=67.49$ ,  $p<0.01$ , and  $F_{1,27}=4.38$ ,  $p<0.05$ , respectively, two-way ANOVA, Fig. S2C). No significant interaction was found ( $F_{1,27}=1.39$ ,  $p=0.26$ , two-way ANOVA). In both untreated and DS-treated mice, latency to groom was significantly higher in anhedonic animals compared to both resilient groups (all  $p<0.01$ , Tukey's test), and to. No group differences were found between untreated and DS-treated subgroups with respect to the development of anhedonia in the latency to groom (resilient:  $p=0.9$ , anhedonic  $p=0.13$ , Tukey's test).

Duration of grooming in the splash test was significantly affected by the interaction of anhedonia and treatment factors ( $F_{1,27}=5.53$ ,  $p=0.03$ , two-way ANOVA, Fig. S2D). Groupwise, in both untreated and DS-treated anhedonic mice, duration of grooming was significantly decreased compared to both resilient groups (all  $p<0.05$ , Tukey's test). No group differences were found between untreated and DS-treated subgroups with respect to this parameter (resilient:  $p=0.07$ , anhedonic  $p=0.88$ , Tukey's test).

In number of grooming episodes, both anhedonia and treatment main factors had significant effect ( $F_{1,27}=12.33$ ,  $p<0.01$ , and  $F_{1,27}=4.68$ ,  $p=0.04$ , two-way ANOVA, Fig. S2E), but not their interaction ( $F_{1,27}=3.06$ ,  $p=0.09$ , two-way ANOVA). Post-hoc test revealed in the DS-treated resilient group, number of grooming episodes was significantly higher than in both DS-treated and untreated anhedonic groups (both  $p<0.01$ , Tukey's test) and untreated resilient mice ( $p=0.04$ , Tukey's test). No group differences were found between untreated and DS-treated anhedonic subgroups with respect to number of grooming episodes ( $p=0.99$ , Tukey's test).

### *Pellet displacement test*

Only the main factor of anhedonia was significant for the latency to displace first food pellet in the pellet displacement test ( $F_{1,27}=24.45$ ,  $p<0.01$ , two-way ANOVA, Fig. S2F). The interaction was borderline significant ( $F_{1,27}=4.21$ ,  $p=0.050$ , two-way ANOVA), and no significant effect of treatment main factor was found ( $F_{1,27}=2.07$ ,  $p=0.16$ , two-way ANOVA). In the untreated anhedonic group, the latency to

displace was significantly increased compared to the untreated resilient group ( $p < 0.01$ , Šídák's test), while no significant difference was found between DS-treated groups ( $p = 0.09$ , Šídák's test).

The number of food pellets displaced during the first 20 minutes of the test was significantly affected by the anhedonia factor ( $F_{1,27} = 30.03$ ,  $p < 0.01$ , two-way ANOVA, Fig.S2G), but not by the treatment factor or their interaction ( $F_{1,27} = 3.18$ ,  $p = 0.09$ , and  $F_{1,27} = 1.25$ ,  $p = 0.27$ , respectively, two-way ANOVA). In both anhedonic groups, number of the pellets displaced in first 20 minutes of the test was significantly lower compared to treatment-matched resilient groups (untreated:  $p = 0.01$ , DS-treated:  $p < 0.01$ , Šídák's test).

#### *Coat disintegration and nest building*

Kruskal-Wallis test revealed a significant difference in the coat disintegration assessment ( $p < 0.01$ , Kruskal-Wallis test, fig. S2H). In the untreated groups, coat score of the anhedonic mice was significantly lower than in resilient animals ( $p = 0.03$ , Dunn's test). No group differences were found between untreated and DS-treated subgroups (anhedonic:  $p = 0.82$ , resilient  $p > 0.99$ , Dunn's test).

Significant differences were found by Kruskal-Wallis test in the nest building score ( $p < 0.01$ , Kruskal-Wallis test, Fig. S2I), however no group differences were found by post-hoc Dunn's test.

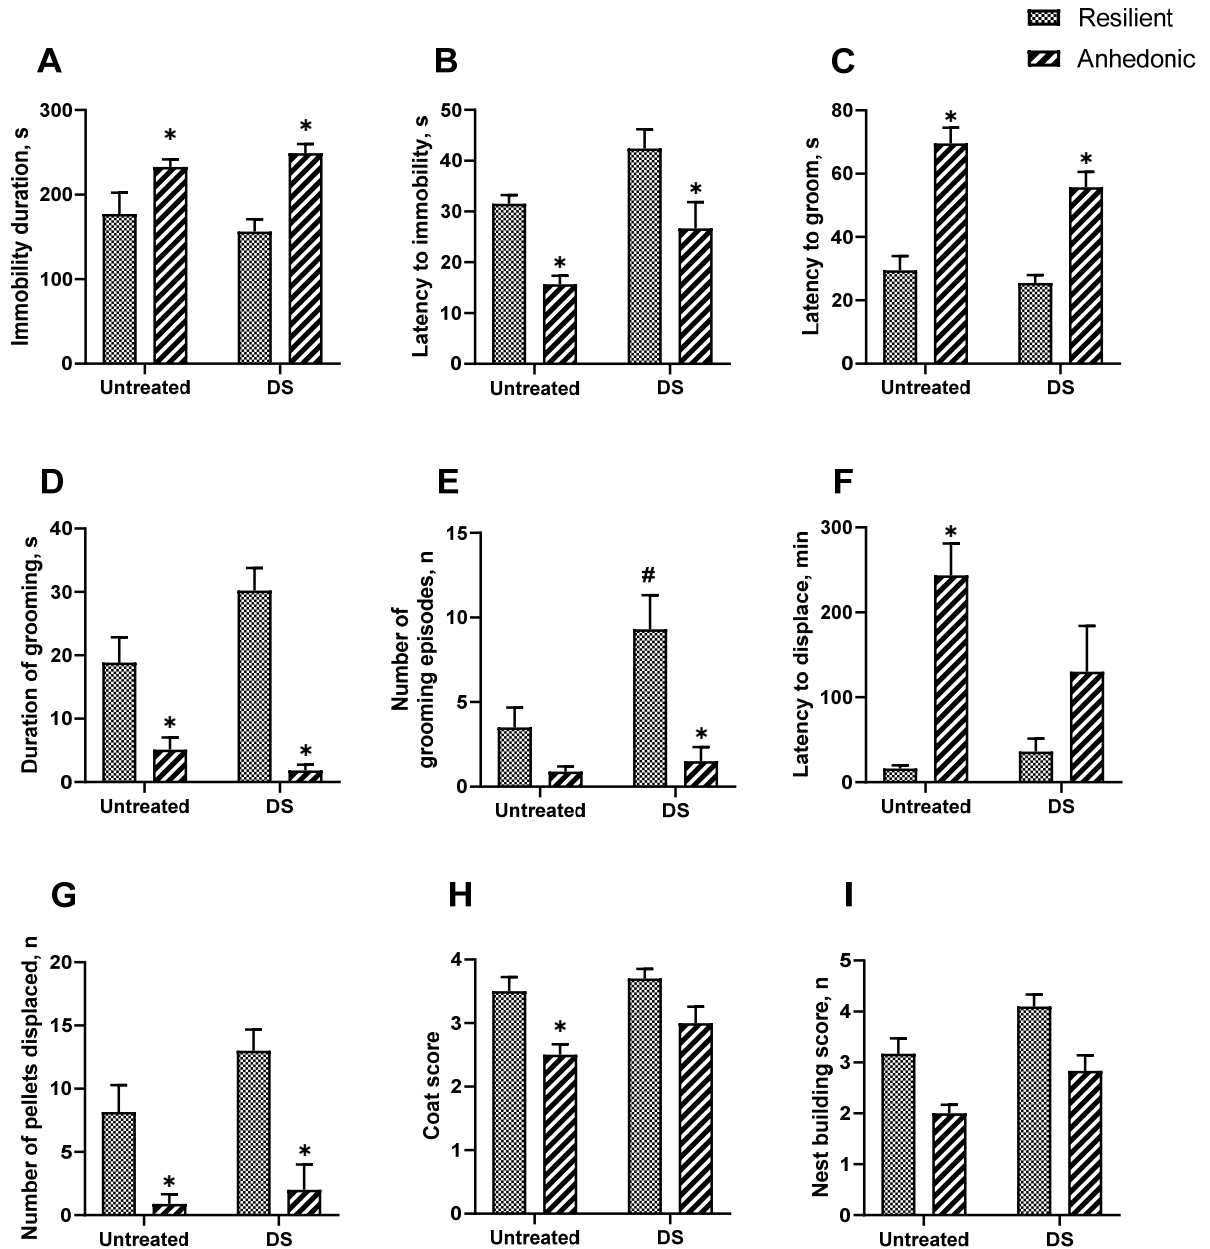

**Figure S2. Comparison of behavioural parameters of stressed anhedonic and resilient animals.** In the tail suspension test, in comparison with treatment-matched resilient groups, both anhedonic groups showed (A) significantly increased immobility duration and (B) decreased latency to immobility. In the splash test, (C) significantly increased latency to groom, and (D) significantly reduced duration of grooming in the anhedonic animals compared to treatment-matched resilient mice was found, (E) the number of grooming episodes was significantly elevated in DS-treated resilient mice compared to both anhedonic DS-treated mice and resilient untreated mice. In the pellet displacement test, (F) the latency to displace the first pellet was significantly increased in untreated anhedonic group compared to the untreated resilient group, while no significant difference was observed between the DS-treated stressed subgroups; (G) both anhedonic subgroups displayed a significantly less pellets displaced during the first 20 minutes of the test than respective resilient groups of mice. Coat disintegration score (H) and nest building score (I) were significantly lowered in both anhedonic groups as compared to treatment-matched resilient groups. \* $p < 0.05$  vs. treatment-matched resilient group, # $p < 0.05$  vs. untreated resilient group, two-way ANOVA with Tukey's test or Šidák's test. Data is presented as mean  $\pm$  SEM.

**Table S1. Expression of mitochondrial oxidative phosphorylation gene pathways.**

| Gene Symbol | Entrez Gene Name                                                                            | Expression fold-change |                     |                      |                      | Entrez Gene ID |       |
|-------------|---------------------------------------------------------------------------------------------|------------------------|---------------------|----------------------|----------------------|----------------|-------|
|             |                                                                                             | Resilient Untreated    | Anhedonic Untreated | Resilient DS-treated | Anhedonic DS-treated | Human          | Mouse |
| ATP5C1      | ATP synthase, H <sup>+</sup> transporting, mitochondrial F1 complex, gamma polypeptide 1    | 1.834                  | −1.097              | 1.764                | 1.058                | 509            | 11949 |
| ATP5D       | ATP synthase, H <sup>+</sup> transporting, mitochondrial F1 complex, delta subunit          | 1.307                  | −1.008              | 1.327                | −1.236               | 513            | 66043 |
| ATP5G2      | ATP synthase, H <sup>+</sup> transporting, mitochondrial Fo complex, subunit C2 (subunit 9) | 1.19                   | −1.146              | 1.644                | −1.129               | 517            | 67942 |
| ATP5J       | ATP synthase, H <sup>+</sup> transporting, mitochondrial Fo complex, subunit F6             | 1.321                  | −1.123              | 1.739                | 1.089                | 522            | 11957 |
| ATP5J2      | ATP synthase, H <sup>+</sup> transporting, mitochondrial Fo complex, subunit F2             | 1.588                  | −1.006              | 1.887                | −1.104               | 9551           | 57423 |
| ATP6V0A1    | ATPase, H <sup>+</sup> transporting, lysosomal V0 subunit a1                                | 2.389                  | 1.072               | 2.201                | −1.055               | 535            | 11975 |
| ATP6V0E1    | ATPase, H <sup>+</sup> transporting, lysosomal 9kDa, V0 subunit e1                          | 1.203                  | −1.128              | 1.446                | 1.035                | 8992           | 11974 |
| ATP6V0E2    | ATPase, H <sup>+</sup> transporting V0 subunit e2                                           | 1.357                  | −1.05               | 1.592                | 1.203                | 155066         | 76252 |
| ATP6V1B2    | ATPase, H <sup>+</sup> transporting, lysosomal 56/58kDa, V1 subunit B2                      | 1.792                  | 1.067               | 1.648                | 1.094                | 526            | 11966 |
| ATP6V1G2    | ATPase, H <sup>+</sup> transporting, lysosomal 13kDa, V1 subunit G2                         | 1.618                  | −1.171              | 1.504                | 1.044                | 534            | 66237 |
| COX5A       | cytochrome c oxidase subunit Va                                                             | 1.328                  | −1.278              | 1.569                | −1.005               | 9377           | 12858 |
| COX6C       | cytochrome c oxidase subunit VIc                                                            | 1.541                  | −1.154              | 1.422                | −1.114               | 1345           | 12864 |
| CYC1        | cytochrome c-1                                                                              | 1.343                  | −1.151              | 1.409                | 1.026                | 1537           | 66445 |
| MT-CO2      | cytochrome c oxidase subunit II                                                             | 1.759                  | −1.068              | 1.307                | −1.124               | 4513           | 17709 |
| MT-ND1      | NADH dehydrogenase, subunit 1 (complex I)                                                   | 1.559                  | −1.153              | 1.506                | −1.012               | 4535           | 17716 |
| MT-ND4L     | NADH dehydrogenase, subunit 4L (complex I)                                                  | 1.869                  | −1.059              | 1.865                | 1.057                | 4539           | 17720 |
| NDUFA1      | NADH dehydrogenase (ubiquinone) 1 alpha subcomplex, 1, 7.5kDa                               | 1.451                  | −1.117              | 2.048                | −1.008               | 4694           | 54405 |
| NDUFA2      | NADH dehydrogenase (ubiquinone) 1 alpha subcomplex, 2, 8kDa                                 | 1.36                   | 1.003               | 1.666                | −1.02                | 4695           | 17991 |
| NDUFA3      | NADH dehydrogenase (ubiquinone) 1 alpha subcomplex, 3, 9kDa                                 | 1.498                  | 1.128               | 1.956                | −1.21                | 4696           | 66091 |
| NDUFA4      | NADH dehydrogenase (ubiquinone) 1 alpha subcomplex, 4, 9kDa                                 | 1.157                  | −1.218              | 1.485                | 1.037                | 4697           | 17992 |
| NDUFA8      | NADH dehydrogenase (ubiquinone) 1 alpha subcomplex, 8, 19kDa                                | 1.348                  | 1.002               | 1.329                | −1.093               | 4702           | 68375 |
| NDUFA9      | NADH dehydrogenase (ubiquinone) 1 alpha subcomplex, 9, 39kDa                                | 1.516                  | −1.093              | 1.983                | 1.297                | 4704           | 66108 |
| NDUFA12     | NADH dehydrogenase (ubiquinone) 1 alpha subcomplex, 12                                      | 1.365                  | −1.009              | 1.55                 | −1.035               | 55967          | 66414 |
| NDUFA13     | NADH dehydrogenase (ubiquinone) 1 alpha subcomplex, 13                                      | 1.223                  | −1.322              | 1.072                | −1.264               | 51079          | 67184 |
| NDUFB3      | NADH dehydrogenase (ubiquinone) 1 beta subcomplex, 3, 12kDa                                 | 1.295                  | −1.088              | 1.717                | −1.014               | 4709           | 66495 |

|        |                                                                                   |       |        |       |        |        |           |
|--------|-----------------------------------------------------------------------------------|-------|--------|-------|--------|--------|-----------|
| NDUFB8 | NADH dehydrogenase (ubiquinone) 1 beta subcomplex, 8, 19kDa                       | 1.303 | −1.178 | 1.513 | −1.012 | 4714   | 67264     |
| NDUFS7 | NADH dehydrogenase (ubiquinone) Fe-S protein 7, 20kDa (NADH-coenzyme Q reductase) | 1.314 | −1.026 | 1.479 | −1.041 | 374291 | 75406     |
| NDUFS8 | NADH dehydrogenase (ubiquinone) Fe-S protein 8, 23kDa (NADH-coenzyme Q reductase) | 1.211 | −1.134 | 1.807 | 1.044  | 4728   | 225887    |
| PPA1   | pyrophosphatase (inorganic) 1                                                     | 1.483 | −1.149 | 1.355 | 1.027  | 5464   | 67895     |
| SDHC   | succinate dehydrogenase complex, subunit C, integral membrane protein, 15kDa      | 1.734 | −1.042 | 1.56  | −1.054 | 6391   | 66052     |
| UQCR11 | ubiquinol-cytochrome c reductase, complex III subunit XI                          | 1.399 | 1.02   | 1.624 | −1.177 | 10975  | 66594     |
| UQCRC1 | ubiquinol-cytochrome c reductase core protein I                                   | 1.415 | 1.031  | 1.627 | 1.1    | 7384   | 22273     |
| UQCRH  | ubiquinol-cytochrome c reductase hinge protein                                    | 1.13  | −1.175 | 1.502 | −1.004 | 7388   | 100042918 |

There were opposite changes in the expression of mitochondrial oxidative phosphorylation pathways in the hippocampus of anhedonic vs. treatment-matched resilient mice, normalized to values of non-stressed untreated controls. Resilient to stress-induced anhedonia mice showed overall an upregulation. Anhedonic mice revealed a general decrease in mitochondrial oxidative phosphorylation pathways that was partially ameliorated in DS-treated animals. Genes symbols and names for Entrez PubMed, human and mouse IDs are indicated (see also ms text).

**Table S2.** Summary of comparisons in the measures of inflammatory markers and 5-HT-related genes expression changes across various brain regions of stressed untreated and DS-treated mice (one-way ANOVA, Tukey's test, \* $p < 0.05$ ). For detailed description of the results, see section 3.7 and Fig. 5 of the manuscript.

| <b><i>Il-1<math>\beta</math></i> mRNA expression</b> |                         |                       |                       |                            |
|------------------------------------------------------|-------------------------|-----------------------|-----------------------|----------------------------|
| <b>Prefrontal cortex</b>                             |                         |                       |                       |                            |
| <i>One-way ANOVA</i>                                 | <b>F(4, 25) = 5.11</b>  |                       | <b>p = 0.0038*</b>    |                            |
| <i>Tukey's test</i><br><i>p-value vs.</i>            | Untreated<br>Control    | Stressed<br>Resilient | Stressed<br>Anhedonic | Stressed<br>Resilient + DS |
| Stressed Resilient                                   | 0.6568                  | —                     |                       |                            |
| Stressed Anhedonic                                   | <b>0.0040*</b>          | 0.0910                | —                     |                            |
| Stressed Resilient + DS                              | 0.1397                  | 0.8195                | 0.5230                | —                          |
| Stressed Anhedonic + DS                              | <b>0.0194*</b>          | 0.2972                | 0.9639                | 0.8847                     |
| <b>Hippocampus</b>                                   |                         |                       |                       |                            |
| <i>One-way ANOVA</i>                                 | <b>F(4, 25) = 6.977</b> |                       | <b>p = 0.0006*</b>    |                            |
| <i>Tukey's test</i><br><i>p-value vs.</i>            | Untreated<br>Control    | Stressed<br>Resilient | Stressed<br>Anhedonic | Stressed<br>Resilient + DS |
| Stressed Resilient                                   | <b>0.0367*</b>          | —                     |                       |                            |
| Stressed Anhedonic                                   | <b>0.0005*</b>          | 0.4131                | —                     |                            |
| Stressed Resilient + DS                              | 0.5019                  | 0.5955                | <b>0.0260*</b>        | —                          |
| Stressed Anhedonic + DS                              | <b>0.0115*</b>          | 0.9865                | 0.7130                | 0.3123                     |
| <b>Raphe</b>                                         |                         |                       |                       |                            |
| <i>One-way ANOVA</i>                                 | <b>F(4, 25) = 8.152</b> |                       | <b>p = 0.0002*</b>    |                            |
| <i>Tukey's test</i><br><i>p-value vs.</i>            | Untreated<br>Control    | Stressed<br>Resilient | Stressed<br>Anhedonic | Stressed<br>Resilient + DS |
| Stressed Resilient                                   | 0.0538                  | —                     |                       |                            |
| Stressed Anhedonic                                   | <b>&lt;0.0001*</b>      | 0.1048                | —                     |                            |
| Stressed Resilient + DS                              | 0.0975                  | 0.9984                | 0.0581                | —                          |
| Stressed Anhedonic + DS                              | <b>0.0042*</b>          | 0.8122                | 0.5748                | 0.6504                     |
| <b>Striatum</b>                                      |                         |                       |                       |                            |
| <i>One-way ANOVA</i>                                 | <b>F(4, 25) = 8.730</b> |                       | <b>p = 0.0001*</b>    |                            |
| <i>Tukey's test</i><br><i>p-value vs.</i>            | Untreated<br>Control    | Stressed<br>Resilient | Stressed<br>Anhedonic | Stressed<br>Resilient + DS |
| Stressed Resilient                                   | 0.0576                  | —                     |                       |                            |
| Stressed Anhedonic                                   | <b>0.0003*</b>          | 0.2430                | —                     |                            |
| Stressed Resilient + DS                              | 0.4511                  | 0.7680                | <b>0.0227*</b>        | —                          |
| Stressed Anhedonic + DS                              | <b>0.0007*</b>          | 0.3789                | 0.9984                | <b>0.0435*</b>             |
| <b>Motor cortex</b>                                  |                         |                       |                       |                            |
| <i>One-way ANOVA</i>                                 | <b>F(4, 25) = 2.805</b> |                       | <b>p = 0.0473*</b>    |                            |
| <i>Tukey's test</i><br><i>p-value vs.</i>            | Untreated<br>Control    | Stressed<br>Resilient | Stressed<br>Anhedonic | Stressed<br>Resilient + DS |
| Stressed Resilient                                   | 0.9129                  | —                     |                       |                            |
| Stressed Anhedonic                                   | 0.0724                  | 0.3356                | —                     |                            |
| Stressed Resilient + DS                              | 0.8292                  | 0.9996                | 0.4451                | —                          |
| Stressed Anhedonic + DS                              | 0.1063                  | 0.4373                | 0.9997                | 0.5582                     |

Table S2. *Continued*

| Tnf mRNA expression        |                  |           |             |                |
|----------------------------|------------------|-----------|-------------|----------------|
| Prefrontal cortex          |                  |           |             |                |
| One-way ANOVA              | F(4, 25) = 4.957 |           | p = 0.0044* |                |
| Tukey's test               | Untreated        | Stressed  | Stressed    | Stressed       |
| p-value vs.                | Control          | Resilient | Anhedonic   | Resilient + DS |
| Stressed Resilient         | 0.9993           | —         |             |                |
| Stressed Anhedonic         | 0.0109*          | 0.0062*   | —           |                |
| Stressed Resilient + DS    | 0.9872           | 0.9485    | 0.0342*     | —              |
| Stressed Anhedonic + DS    | 0.4841           | 0.3549    | 0.3147      | 0.7779         |
| Hippocampus                |                  |           |             |                |
| One-way ANOVA              | F(4, 25) = 5.627 |           | p = 0.0023* |                |
| Tukey's test               | Untreated        | Stressed  | Stressed    | Stressed       |
| p-value vs.                | Control          | Resilient | Anhedonic   | Resilient + DS |
| Stressed Resilient         | 0.6054           | —         |             |                |
| Stressed Anhedonic         | 0.0018*          | 0.0569    | —           |                |
| Stressed Resilient + DS    | 0.9837           | 0.8872    | 0.0068*     | —              |
| Stressed Anhedonic + DS    | 0.3186           | 0.9862    | 0.1562      | 0.6196         |
| Raphe                      |                  |           |             |                |
| One-way ANOVA              | F(4, 25) = 1.763 |           | p = 0.1693  |                |
| No significant differences |                  |           |             |                |
| Striatum                   |                  |           |             |                |
| One-way ANOVA              | F(4, 25) = 1.366 |           | p = 0.2738  |                |
| No significant differences |                  |           |             |                |
| Motor cortex               |                  |           |             |                |
| One-way ANOVA              | F(4, 25) = 2.188 |           | p = 0.0995  |                |
| No significant differences |                  |           |             |                |
| Cox-1 mRNA expression      |                  |           |             |                |
| Prefrontal cortex          |                  |           |             |                |
| One-way ANOVA              | F(4, 25) = 14.10 |           | p < 0.0001* |                |
| Tukey's test               | Untreated        | Stressed  | Stressed    | Stressed       |
| p-value vs.                | Control          | Resilient | Anhedonic   | Resilient + DS |
| Stressed Resilient         | <0.0001*         | —         |             |                |
| Stressed Anhedonic         | <0.0001*         | >0.9999   | —           |                |
| Stressed Resilient + DS    | 0.0007*          | 0.4832    | 0.4132      | —              |
| Stressed Anhedonic + DS    | 0.0001*          | 0.8734    | 0.8179      | 0.9559         |
| Hippocampus                |                  |           |             |                |
| One-way ANOVA              | F(4, 25) = 5.064 |           | p = 0.004*  |                |
| Tukey's test               | Untreated        | Stressed  | Stressed    | Stressed       |
| p-value vs.                | Control          | Resilient | Anhedonic   | Resilient + DS |
| Stressed Resilient         | 0.0839           | —         |             |                |
| Stressed Anhedonic         | 0.0034*          | 0.6446    | —           |                |
| Stressed Resilient + DS    | 0.7821           | 0.5429    | 0.0509      | —              |
| Stressed Anhedonic + DS    | 0.8078           | 0.5129    | 0.0457*     | >0.9999        |



**Table S2. Continued**

| Raphe                      |                     |           |             |                |
|----------------------------|---------------------|-----------|-------------|----------------|
| One-way ANOVA              | F(4, 25) = 3.824    |           | p = 0.0246* |                |
| Tukey's test               | Untreated           | Stressed  | Stressed    | Stressed       |
| p-value vs.                | Control             | Resilient | Anhedonic   | Resilient + DS |
| Stressed Resilient         | 0.2315              | —         |             |                |
| Stressed Anhedonic         | 0.0225*             | 0.6905    | —           |                |
| Stressed Resilient + DS    | 0.0503              | 0.8988    | 0.9924      | —              |
| Stressed Anhedonic + DS    | 0.5328              | 0.9687    | 0.3428      | 0.5733         |
| Striatum                   |                     |           |             |                |
| One-way ANOVA              | F(4, 25) = 3.052    |           | p = 0.0354* |                |
| Tukey's test               | Untreated           | Stressed  | Stressed    | Stressed       |
| p-value vs.                | Control             | Resilient | Anhedonic   | Resilient + DS |
| Stressed Resilient         | 0.2461              | —         |             |                |
| Stressed Anhedonic         | 0.0229*             | 0.7664    | —           |                |
| Stressed Resilient + DS    | 0.0892              | 0.9812    | 0.9697      | —              |
| Stressed Anhedonic + DS    | 0.2652              | >0.9999   | 0.7409      | 0.9748         |
| Motor cortex               |                     |           |             |                |
| One-way ANOVA              | F(4, 25) = 2.936    |           | p = 0.0406* |                |
| Tukey's test               | Untreated           | Stressed  | Stressed    | Stressed       |
| p-value vs.                | Control             | Resilient | Anhedonic   | Resilient + DS |
| Stressed Resilient         | 0.5588              | —         |             |                |
| Stressed Anhedonic         | 0.0526              | 0.6380    | —           |                |
| Stressed Resilient + DS    | 0.0620              | 0.6849    | >0.9999     | —              |
| Stressed Anhedonic + DS    | 0.1580              | 0.9139    | 0.9812      | 0.9894         |
| 5-Htt mRNA expression      |                     |           |             |                |
| Prefrontal cortex          |                     |           |             |                |
| One-way ANOVA              | F(4, 25) = 11.70    |           | p < 0.0001* |                |
| Tukey's test               | Untreated           | Stressed  | Stressed    | Stressed       |
| p-value vs.                | Control             | Resilient | Anhedonic   | Resilient + DS |
| Stressed Resilient         | 0.9873              | —         |             |                |
| Stressed Anhedonic         | <0.0001*            | 0.0001*   | —           |                |
| Stressed Resilient + DS    | 0.9940              | >0.9999   | 0.0001*     | —              |
| Stressed Anhedonic + DS    | 0.6944              | 0.9264    | 0.0010*     | 0.8967         |
| Hippocampus                |                     |           |             |                |
| One-way ANOVA              | W(4, 11.56) = 3.073 |           | p = 0.0266* |                |
| Tukey's test               | Untreated           | Stressed  | Stressed    | Stressed       |
| p-value vs.                | Control             | Resilient | Anhedonic   | Resilient + DS |
| Stressed Resilient         | 0.3352              | —         |             |                |
| Stressed Anhedonic         | 0.5620              | 0.6356    | —           |                |
| Stressed Resilient + DS    | >0.9999             | 0.3896    | 0.5666      | —              |
| Stressed Anhedonic + DS    | 0.1300              | 0.8208    | 0.7098      | 0.1435         |
| Raphe                      |                     |           |             |                |
| One-way ANOVA              | F(4, 25) = 0.8388   |           | p = 0.5136  |                |
| No significant differences |                     |           |             |                |

Table S2. *Continued*

| Striatum                    |                      |                       |                       |                            |
|-----------------------------|----------------------|-----------------------|-----------------------|----------------------------|
| One-way ANOVA               | F(4, 25) = 2.039     |                       | p = 0.1196            |                            |
| No significant differences  |                      |                       |                       |                            |
| Motor cortex                |                      |                       |                       |                            |
| One-way ANOVA               | F(4, 10.23) = 3.738  |                       | p = 0.0403*           |                            |
| Tukey's test<br>p-value vs. | Untreated<br>Control | Stressed<br>Resilient | Stressed<br>Anhedonic | Stressed<br>Resilient + DS |
| Stressed Resilient          | 0.9943               | —                     |                       |                            |
| Stressed Anhedonic          | 0.2332               | 0.2952                | —                     |                            |
| Stressed Resilient + DS     | 0.9932               | >0.9999               | 0.2902                | —                          |
| Stressed Anhedonic + DS     | 0.9469               | 0.9982                | 0.3510                | 0.9978                     |
| 5Htr2a mRNA expression      |                      |                       |                       |                            |
| Prefrontal cortex           |                      |                       |                       |                            |
| One-way ANOVA               | F(4, 25) = 12.32     |                       | p < 0.0001*           |                            |
| Tukey's test<br>p-value vs. | Untreated<br>Control | Stressed<br>Resilient | Stressed<br>Anhedonic | Stressed<br>Resilient + DS |
| Stressed Resilient          | 0.3213               | —                     |                       |                            |
| Stressed Anhedonic          | 0.0001*              | 0.0186*               | —                     |                            |
| Stressed Resilient + DS     | 0.9833               | 0.6249                | 0.0006*               | —                          |
| Stressed Anhedonic + DS     | 0.0003*              | 0.0383*               | 0.9977                | 0.0013*                    |
| Hippocampus                 |                      |                       |                       |                            |
| One-way ANOVA               | F(4, 25) = 18.60     |                       | p < 0.0001*           |                            |
| Tukey's test<br>p-value vs. | Untreated<br>Control | Stressed<br>Resilient | Stressed<br>Anhedonic | Stressed<br>Resilient + DS |
| Stressed Resilient          | 0.0093*              | —                     |                       |                            |
| Stressed Anhedonic          | 0.5620               | 0.2311                | —                     |                            |
| Stressed Resilient + DS     | <0.0001*             | 0.0108*               | <0.0001*              | —                          |
| Stressed Anhedonic + DS     | >0.9999              | 0.0114*               | 0.6132                | <0.0001*                   |
| Raphe                       |                      |                       |                       |                            |
| One-way ANOVA               | F(4, 25) = 1.948     |                       | p = 0.1336            |                            |
| No significant differences  |                      |                       |                       |                            |
| Striatum                    |                      |                       |                       |                            |
| One-way ANOVA               | F(4, 25) = 5.649     |                       | p = 0.0022            |                            |
| Tukey's test<br>p-value vs. | Untreated<br>Control | Stressed<br>Resilient | Stressed<br>Anhedonic | Stressed<br>Resilient + DS |
| Stressed Resilient          | 0.0820               | —                     |                       |                            |
| Stressed Anhedonic          | 0.0023*              | 0.5495                | —                     |                            |
| Stressed Resilient + DS     | 0.0360*              | 0.9951                | 0.7770                | —                          |
| Stressed Anhedonic + DS     | 0.0048*              | 0.7314                | 0.9981                | 0.9115                     |
| Motor cortex                |                      |                       |                       |                            |
| One-way ANOVA               | F(4, 25) = 0.4424    |                       | p = 0.7768            |                            |
| No significant differences  |                      |                       |                       |                            |
